# Supplementary material for: Evolution, Diversification, and Biogeography of Grasshoppers (Orthoptera: Acrididae)
Source: Oxford University Press journal article supplement (doi:10.1093/isd/ixy008), 2018-07-01
Supplement: ixy008_suppl_supplement_table_1.pdf [file ixy008_suppl_supplement_table_1.pdf]

| Voucher # (TAMUIC-IGC-#) | Family    | Subfamily           | Species                               | Collecting locality                                                                                                    | Collecting date      |
|--------------------------|-----------|---------------------|---------------------------------------|------------------------------------------------------------------------------------------------------------------------|----------------------|
| OR059                    | Acrididae | Acridinae           | <i>Acrida willemsei</i>               | Malaysia: Sabah, Croker Rng. NP, HQ station rd.                                                                        | 9-VIII-2003          |
| OR192                    | Acrididae | Acridinae           | <i>Calephorus compressicornis</i>     | Niger: Niamey (N 13 30 19.74 – E 002 06 38.19)                                                                         | V-2005               |
| OR512                    | Acrididae | Acridinae           | <i>Coryphosima stenoptera</i>         | Mt. Hanang 2600 Im montane grassland                                                                                   | I-2008               |
| OR511                    | Acrididae | Acridinae           | <i>Gymnobothrus sp</i>                | Zambia: Copperbelt Province Kitwe District, Mwekere Forest Reserve, ~8km S Kitwe (S 12 51'45.2" E28 21' 08.7")         | 18-30-IV-2006        |
| OR240                    | Acrididae | Acridinae           | <i>Hyalopteryx rufipennis</i>         | Argentina: Pv. De Catamarca Entrada a Quebrada de Gandolfo (S 26 51 48.0 W 66 44 19.0)                                 | 10-I-2003            |
| OR514                    | Acrididae | Acridinae           | <i>Keya capicola</i>                  | South Africa: Western Cape Province, Cederburg State Forest Driehoek turn off, Div Vlei (S 32o 25.946' E 109o 08.827") | 7-II-2009            |
| OR513                    | Acrididae | Acridinae           | <i>Orthochtha sp</i>                  | South Africa: Kruger Nat'l Park Mantiuahle access road                                                                 | 13-III-2005          |
| OR510                    | Acrididae | Acridinae           | <i>Truxalis sp</i>                    | South Africa: Kruger Nat'l Park, Ngotso Dam                                                                            | 16-III-2005          |
| OR195                    | Acrididae | Calliptaminae       | <i>Acorypha sp</i>                    | South Africa: KwaZulu-Natal-Drakensberg, Draycott                                                                      | 29-III-2005          |
| OR193                    | Acrididae | Calliptaminae       | <i>Calliptamus italicus</i>           | Spain: Balaguer (N41 52 08.28 – E 000 48 57.7)                                                                         | VII-2008             |
| OR194                    | Acrididae | Calliptaminae       | <i>Paracaloptenus caloptenoides</i>   | Greece: Patras (N 38 15 39.34 – E 21 50 51.15)                                                                         | V-2007               |
| OR493                    | Acrididae | Catantopinae        | <i>Apotropis vittata</i>              | Australia: Western Australia, 10 km E Norseman off Highway 1 (S 32o 06.467' E 121o 55.073')                            | 10-IX-2009           |
| OR500                    | Acrididae | Catantopinae        | <i>Buforania sp</i>                   | Australia: Western Australia, Woodenooka Nature Reserve (Urawa NR) (S 28o 23.909' E 115o 34.601')                      | 4-IX-2009            |
| OR237                    | Acrididae | Catantopinae        | <i>Catantops sp</i>                   | Zambia: Copperbelt Province, Kitwe District, Kumasamba Lodge near Kafue River, ~5km S Kitwe (S 12 54 20, E 28 14 22.3) | 18-30-IV-2006        |
| OR490                    | Acrididae | Catantopinae        | <i>Cedarinia sp</i>                   | Australia: Western Australia, Lake Campion Nature Reserve (S 31o 07.832' E 118o 24.982")                               | 12-IX-2009           |
| OR503                    | Acrididae | Catantopinae        | <i>Coryphistes ruricola</i>           | Australia: Western Australia, Bullfinch (S 30o 58.606' E 199o 07.152')                                                 | 12-IX-2009           |
| OR495                    | Acrididae | Catantopinae        | <i>Ephantus quadrilobus</i>           | Australia: Western Australia, 60km S of Leonora off Goldfields Highway (S 29o 16.715' E 121o 17.197")                  | 7-IX-2009            |
| OR491                    | Acrididae | Catantopinae        | <i>Gen nov. 46 sp. 1</i>              | Australia: Western Australia, 10 km E Norseman off Highway 1 (S 32o 06.467' E 121o 55.073')                            | 10-IX-2009           |
| OR489                    | Acrididae | Catantopinae        | <i>Gen nov. 64 sp. 1</i>              | Australia: Western Australia, 50 km E of Leonora off Highway to Levanston (S 28o 45.335' E 121o 59.044;)               | 6-IX-2009            |
| OR502                    | Acrididae | Catantopinae        | <i>Goniaea vocans</i>                 | Australia: Western Australia El Questro-Emma Gorge Resort (S 15 54' 16.1" E 128 07' 40.7")                             | 26-IX-2002           |
| OR574                    | Acrididae | Catantopinae        | <i>Kinangopa jeanneli</i>             | Mt Kenya                                                                                                               | II-2003              |
| OR235                    | Acrididae | Catantopinae        | <i>Macrolopholia sp</i>               | Australia: Northern Territory Mary River-roadhouse camp South edge of Kakadu NP (S 13 36 47.1 E 132 13 41.3)           | 27-IX-2002           |
| OR488                    | Acrididae | Catantopinae        | <i>Macrotona sp</i>                   | Australia: Western Australia, ~100 km SE Menzies off Yarr Road Spinifex (S29o 56.949' E121o 55.078')                   | 8-IX-2009            |
| OR505                    | Acrididae | Catantopinae        | <i>Pezocatantops sp</i>               | Kenya: Githunguru 2200m                                                                                                | XII-2004             |
| OR504                    | Acrididae | Catantopinae        | <i>Phaeocatantops sp</i>              | Tanzania: Nou foreset 2100m                                                                                            | II-2005              |
| OR494                    | Acrididae | Catantopinae        | <i>Poraxia sp</i>                     | Australia: Western Australia, ~32km N Eneabba off Correy Road (~8km in) (S 29o 34.670; E 115o 15.282')                 | 2-IX-2009            |
| OR496                    | Acrididae | Catantopinae        | <i>Retuspia validicornis</i>          | Australia: Western Australia, 50 km E of Leonora off Highway to Levanston (S 28o 45.335' E 121o 59.044;)               | 6-IX-2009            |
| OR497                    | Acrididae | Catantopinae        | <i>Rusurplia tristis</i>              | Australia: Western Australia, 50 km E of Leonora off Highway to Levanston (S 28o 45.335' E 121o 59.044;)               | 6-IX-2009            |
| OR498                    | Acrididae | Catantopinae        | <i>Stenocatantops vitripennis</i>     | Australia: Western Australia, El Questro-Emma Gorge Resort (S 15o 54' 16.1" E128o 07.40.7")                            | 26-IX-2002           |
| N/A                      | Acrididae | Catantopinae        | <i>Traulia szetschuanensis</i>        | China, from Genbank                                                                                                    |                      |
| OR492                    | Acrididae | Catantopinae        | <i>Typaya semicristata</i>            | Australia: Western Australia, Bullfinch (S 30o 58.606' E 199o 07.152')                                                 | 12-IX-2009           |
| OR501                    | Acrididae | Catantopinae        | <i>Urnisa guttulosa</i>               | Australia: Western Australia, 20km N of Leinster off Goldfields Highway (S 27o 44.590' E 120o 32.661')                 | 5-IX-2009            |
| OR499                    | Acrididae | Catantopinae        | <i>Urnisiella rubropunctata</i>       | Australia: Western Australia, 80 km S of Leonora off Goldfields Highway (S 29o 33.605' E121o 11.289')                  | 7-IX-2009            |
| OR236                    | Acrididae | Catantopinae        | <i>Xenocatantops brachycerus</i>      | PNG: Eastern Highlands Province, Herowana Village, Crater Mountain Research Area                                       | 15-19-VII-2001       |
| OR333                    | Acrididae | Copiocerinae        | <i>Copiocera sp</i>                   | South America, from Amegenato                                                                                          |                      |
| OR334                    | Acrididae | Copiocerinae        | <i>Cyphacris sp</i>                   | South America, from Amegenato                                                                                          |                      |
| OR509                    | Acrididae | Coptacridinae       | <i>Eucoptacra sp</i>                  | Kenya: Nairobi, Gigiri                                                                                                 | I-2002               |
| OR508                    | Acrididae | Coptacridinae       | <i>Parepistaurus deses</i>            | Mt. Kilimanjaro HS397                                                                                                  | IV-2002              |
| OR183                    | Acrididae | Cyrtacanthacridinae | <i>Acanthacris ruficornis</i>         | Namibia: Etosha NP (19 10.484S 15 54.872 E) Ojivisandy                                                                 | 15-22-V-2004         |
| OR546                    | Acrididae | Cyrtacanthacridinae | <i>Acridoderes sp</i>                 | Zambia: Copperbelt Province, Kitwe District, Kumasamba Lodge near Kafue River, ~5km S Kitwe (S 12 54 20, E 28 14 22.3) | 18-30-VI-2006        |
| OR184                    | Acrididae | Cyrtacanthacridinae | <i>Anacridium incisum</i>             | Namibia: Etosha NP Devilwater Spring (18 59 266 S 15 15 593 E)                                                         | 18-V-2004            |
| OR182                    | Acrididae | Cyrtacanthacridinae | <i>Austracris guttulosa</i>           | PNG: ENBP Kulau Lodge (4 11.990S 152 5.984E)                                                                           | 21-29-VII-2008       |
| N/A                      | Acrididae | Cyrtacanthacridinae | <i>Chondracris rosea</i>              | China, from Genbank                                                                                                    |                      |
| OR181                    | Acrididae | Cyrtacanthacridinae | <i>Cyrtacanthacris tatarica</i>       | South Africa: Kruger Nat'l Park Btw Ngotso Dam, Satara                                                                 | 16-III-2005          |
| OR545                    | Acrididae | Cyrtacanthacridinae | <i>Nomadacris septemfasciata</i>      | Madagascar: Fianarantsoa Ranamafana National Park Centre ValBio                                                        | 10-13, 19-22-XI-2009 |
| OR544                    | Acrididae | Cyrtacanthacridinae | <i>Ornithacris sp</i>                 | Cameroon: South of Tibati Mbam Djere National Park WCS guesthouse, 2537 feet (N06 12'45.5" E12 45'05.2")               | 18, 21-22-III-2009   |
| OR547                    | Acrididae | Cyrtacanthacridinae | <i>Rhadinacris schistocercoides</i>   | Madagascar: Majunga Prov. Maintirano District 50km E of Maintirano (18 0.24'S 44 27.12'E)                              | 24-II-2-III-2009     |
| OR185                    | Acrididae | Cyrtacanthacridinae | <i>Schistocerca gregaria</i>          | Bolivia: Santa Cruz Co. Conception, MVL (S 16 26.790 W 062 28.984)                                                     | 12-I-2004            |
| OR313                    | Acrididae | Euryphyminae        | <i>Calliptamicus sp</i>               | South Africa: Western Cape Prov. Hottentots Holland NR Pine Forest (S34 05.119' E019 02.499')                          | 10-II-2009           |
| OR311                    | Acrididae | Euryphyminae        | <i>Calliptamulus sp</i>               | South Africa: Eastern Cape Prov. Mpofu Game Reserve (S32 35.879' E026 34.414')                                         | 19-II-2009           |
| OR314                    | Acrididae | Euryphyminae        | <i>Euryphymus sp</i>                  | South Africa: Western Cape Prov. Anysberg NR (S33 28.052' E020 36.120')                                                | 22-II-2009           |
| OR308                    | Acrididae | Euryphyminae        | <i>Pachyphymus sp</i>                 | South Africa: Western Cape Prov. Near Eierpoort (S33 39.745' E020 34.031')                                             | 22-II-2009           |
| OR312                    | Acrididae | Euryphyminae        | <i>Rhacitopsis sp</i>                 | South Africa: Eastern Cape Prov. Great Fish River NR near Great Fish River (S33 04.885' E026 47.163')                  | 18-II-2009           |
| OR218                    | Acrididae | Eyreprocnemidinae   | <i>Cataloipus sp</i>                  | South Africa: Kruger Nat'l Park Berg-en-dal                                                                            | 12-III-2005          |
| OR309                    | Acrididae | Eyreprocnemidinae   | <i>Eyreprocnemis plorans</i>          | South Africa: Western Cape Prov. Cederberg State Forest Driehoek turn off, Dic Blei (S32 25.946' E019 08.627")         | 7-II-2009            |
| OR310                    | Acrididae | Eyreprocnemidinae   | <i>Heteracris sp</i>                  | South Africa: Drakensburg NP Giant's Castle                                                                            | 24-III-2005          |
| N/A                      | Acrididae | Eyreprocnemidinae   | <i>Shirakiacris shirakii</i>          | China, from Genbank                                                                                                    |                      |
| OR219                    | Acrididae | Eyreprocnemidinae   | <i>Tylotropidius sp</i>               | Zambia: Copperbelt Province, Kitwe District, Mwekere Forest Reserve, ~8km S Kitwe, S12 51" 45.2 E28 21'08.7"           | 18-30-IV-2006        |
| N/A                      | Acrididae | Gomphocerinae       | <i>Arcyptera coreana</i>              | China, from Genbank                                                                                                    |                      |
| OR521                    | Acrididae | Gomphocerinae       | <i>Aulocara elliotii</i>              | USA: UT, Sevier Co. Fish Lake Lodge (N 38o 32'48.2" W111o43'30.3")                                                     | 24-VII-2009          |
| OR226                    | Acrididae | Gomphocerinae       | <i>Dichromorpha viridis</i>           | USA: LA, Sabine Parish, Many (N 31 34 45.1 W 93 28 15.7)                                                               | 1-VI-2002            |
| N/A                      | Acrididae | Gomphocerinae       | <i>Euchorthippus fusigeniculatus</i>  | China, from Genbank                                                                                                    |                      |
| N/A                      | Acrididae | Gomphocerinae       | <i>Gomphocerus sibiricus</i>          | China, from Genbank                                                                                                    |                      |
| OR520                    | Acrididae | Gomphocerinae       | <i>Mermiria intertexta</i>            | USA: Florida, Collier Co. wetland, W of Carnestown (N 25o 58'18.4" W81o30'26.2")                                       | 5-VIII-2009          |
| OR239                    | Acrididae | Gomphocerinae       | <i>Mesopsis sp</i>                    | South Africa: Kruger Nat'l Park Btw Satara & Tshokware Access Rd.                                                      | 13-III-2005          |
| N/A                      | Acrididae | Gomphocerinae       | <i>Orinhippus tibetanus</i>           | China, from Genbank                                                                                                    |                      |
| N/A                      | Acrididae | Gomphocerinae       | <i>Pacris xizangensis</i>             | China, from Genbank                                                                                                    |                      |
| N/A                      | Acrididae | Gomphocerinae       | <i>Phlaeoba albomema</i>              | China, from Genbank                                                                                                    |                      |
| OR519                    | Acrididae | Gomphocerinae       | <i>Pseudogmthela sp</i>               | South Africa: Eastern Cape Province, Great Fish River NR Fort on main road (S 32o59.713' E026o50.443')                 | 17-II-2009           |
| OR346                    | Acrididae | Gomphocerinae       | <i>Rhammatocerus schistocercoides</i> | South America, from Amegenato                                                                                          |                      |

|        |               |                    |                                     |                                                                                                           |                    |
|--------|---------------|--------------------|-------------------------------------|-----------------------------------------------------------------------------------------------------------|--------------------|
| OR518  | Acrididae     | Gomphocerinae      | <i>Rhaphotittha sp</i>              | South Africa: Kruger Nat'l Park Mantiuahle access road                                                    |                    |
| OR343  | Acrididae     | Gomphocerinae      | <i>Silvitettix sp</i>               | South America, from Amegeno                                                                               | 13-III-2005        |
| OR227  | Acrididae     | Gomphocerinae      | <i>Syrbula montezuma</i>            | USA: AZ, Santa Cruz Co. Pena Blanca Lake, Coronado NF                                                     | 9-10-VIII-2000     |
| OR305  | Acrididae     | Hemiacridinae      | <i>Dirshacris aridus</i>            | South Africa: Eastern Cape Prov. Baviaanskloof, NR along T1 (S33 37.907° E024 17.238°)                    | 14-II-2009         |
| OR302  | Acrididae     | Hemiacridinae      | <i>Eurotyma sp</i>                  | South Africa: Western Cape Prov. Groot Winterhoek Wilderness Area Langvlei (S33 01.228° E019 03.106°)     | 9-II-2009          |
| N/A    | Acrididae     | Hemiacridinae      | <i>Hieroglyphus tonkinensis</i>     | China, from Genbank                                                                                       |                    |
| OR304  | Acrididae     | Hemiacridinae      | <i>Leptacris sp</i>                 | Cameroun: South of Tibati Mbam Djerem National Park WCS guesthouse, 2537 feet (N06 12'45.5" E12 45'05.2") | 18, 21-22-III-2009 |
| OR301  | Acrididae     | Hemiacridinae      | <i>Paulianiobia hirsuta</i>         | Madagascar: Tolilara Berenty Private Reserve, Alluvial Forest (S25 00' 20.6" E46 18' 09.3")               | 16-17-XI-2008      |
| OR303  | Acrididae     | Hemiacridinae      | <i>Pristocorypha sp</i>             | South Africa: Kruger Nat'l Park Sabie River, Saltje Road                                                  | 16-III-2005        |
| OR214  | Acrididae     | Leptymsinae        | <i>Prorocorypha snowi</i>           | USA: AZ, Santa Cruz Co. Pena Blanca Lake, Coronado NF                                                     | 9-10-VIII-2000     |
| OR342  | Acrididae     | Leptymsinae        | <i>Stenacris sp</i>                 | South America, from Amegeno                                                                               |                    |
| OR220  | Acrididae     | Leptymsinae        | <i>Stenopola sp</i>                 | Bolivia: Santa Cruz Co. Buena Vista, border of Buena Vista NP (S 17 41.721, W 063 33.766)                 | 10-I-2004          |
| OR338  | Acrididae     | Leptymsinae        | <i>Tetrataenia surinama</i>         | South America, from Amegeno                                                                               |                    |
| OR344  | Acrididae     | Marellinae         | <i>Marellia remipes</i>             | South America, from Amegeno                                                                               |                    |
| OR356  | Acrididae     | Melanoplineae      | <i>Anapodisma miramae</i>           | South Korea: Gyeonggi Prov. Gapyung Myungji Mt. Seungchun Temple                                          | 8-IX-2001          |
| OR516  | Acrididae     | Melanoplineae      | <i>Aptenopedes sphenarioides</i>    | USA: Florida, Collier Co. wetland, W of Carnestown (N 25o 58'18.4" W81o30'26.2")                          | 5-VIII-2009        |
| OR515  | Acrididae     | Melanoplineae      | <i>Bradynotes obesa</i>             | USA: CA, Mono Co. Sonora Pass                                                                             | 21-VIII-2001       |
| OR325  | Acrididae     | Melanoplineae      | <i>Dichroplus sp</i>                | South America, from Amegeno                                                                               |                    |
| N/A    | Acrididae     | Melanoplineae      | <i>Fruhstorferiella kulinga</i>     | China, from Genbank                                                                                       |                    |
| OR517  | Acrididae     | Melanoplineae      | <i>Hesperotettix viridis</i>        | USA: Arizona, Cochise Co. Sunny Flat Campground, SW of Portal (N 31o 53'08.5" W 109o 10' 30.5")           | 18-VII-2009        |
| OR328  | Acrididae     | Melanoplineae      | <i>Jivarus ronderosi</i>            | South America, from Amegeno                                                                               |                    |
| N/A    | Acrididae     | Melanoplineae      | <i>Kingdonella bicollina</i>        | China, from Genbank                                                                                       |                    |
| OR329  | Acrididae     | Melanoplineae      | <i>Maeacris aptera</i>              | South America, from Amegeno                                                                               |                    |
| OR245  | Acrididae     | Melanoplineae      | <i>Melanoplus bivittatus</i>        | USA: UT: Utah Co. Spanish Fork River                                                                      | 4-11-VIII-2003     |
| OR394  | Acrididae     | Melanoplineae      | <i>Ognevia longipennis</i>          | South Korea: Gyeonggi Prov. Gapyung Myungji Mt. Seungchun Temple                                          | 15-VIII-2001       |
| OR324  | Acrididae     | Melanoplineae      | <i>Ponderacris peruvianus</i>       | South America, from Amegeno                                                                               |                    |
| OR395  | Acrididae     | Melanoplineae      | <i>Prumna arctica</i>               | South Korea: Chungbook Chungjoo Jongmin-dong Kyemyung Mt.                                                 | 17-VI-2003         |
| N/A    | Acrididae     | Melanoplineae      | <i>Qinlingacris taibaiensis</i>     | China, from Genbank                                                                                       |                    |
| OR190  | Acrididae     | Oedipodinae        | <i>Acrotylus patruelis</i>          | Niger: Niamey (N 13 30 19.74 – E 002 06 38.19)                                                            | V-2005             |
| N/A    | Acrididae     | Oedipodinae        | <i>Angaracris barabensis</i>        | China, from Genbank                                                                                       |                    |
| N/A    | Acrididae     | Oedipodinae        | <i>Bryodemina miramae miramae</i>   | China, from Genbank                                                                                       |                    |
| N/A    | Acrididae     | Oedipodinae        | <i>Ceracris kiangsu</i>             | China, from Genbank                                                                                       |                    |
| OR524  | Acrididae     | Oedipodinae        | <i>Chortoicetes terminifera</i>     | Australia: Western Australia, 30km N of Norseman off Goldfields Highway (S32o03.672' E121o40.821')        | 10-IX-2009         |
| N/A    | Acrididae     | Oedipodinae        | <i>Gastrimargus marmoratus</i>      | China, from Genbank                                                                                       |                    |
| OR225  | Acrididae     | Oedipodinae        | <i>Heteropternis sp</i>             | South Africa: Drakensburg NP Giant's Castle                                                               | 24-III-2005        |
| OR191  | Acrididae     | Oedipodinae        | <i>Locusta migratoria</i>           | France: Aumelas (N 43 35 52.35 – E 003 38 10 .04)                                                         | VI-2007            |
| OR522  | Acrididae     | Oedipodinae        | <i>Psinidia fenestralis</i>         | USA: Florida, Collier Co. wetland, W of Carnestown (N 25o 58'18.4" W81o30'26.2")                          | 6-VII-2009         |
| OR525  | Acrididae     | Oedipodinae        | <i>Pycnostictus seriatus</i>        | Australia: Western Australia, 5km S of Leonora (S28o54.436' E121o20.882')                                 | 6-IX-2009          |
| OR526  | Acrididae     | Oedipodinae        | <i>Qualetta maculata</i>            | Australia: Western Australia, 30km E of Leonora (S28o53.292' E121o22.295')                                | 6-IX-2009          |
| OR523  | Acrididae     | Oedipodinae        | <i>Tomonotus ferruginosus</i>       | USA: Arizona, Cochise Co. Sunny Flat Campground, SW of Portal (N 31o 53'08.5" W 109o 10' 30.5")           | 18-VII-2009        |
| N/A    | Acrididae     | Oedipodinae        | <i>Trilophidia annulata</i>         | China, from Genbank                                                                                       |                    |
| OR186  | Acrididae     | Oedipodinae        | <i>Trimerotropis sp</i>             | USA: UT: Utah Co. Provo, BYU Bell Tower,                                                                  | 7-VII-2000         |
| OR187  | Acrididae     | Oedipodinae        | <i>Xanthippus sp</i>                | USA: UT: Utah Co. Vivian Park                                                                             | 22-V-2003          |
| OR222  | Acrididae     | Ommatolampinae     | <i>Abracris sp</i>                  | Peru: Rio Tambopata Explorer's Inn (S 12 50.208, W 69 17.603)                                             | 2-13-VIII-2005     |
| OR362  | Acrididae     | Ommatolampinae     | <i>Anabysis teres</i>               | South America, from Amegeno                                                                               |                    |
| OR363  | Acrididae     | Ommatolampinae     | <i>Kyphiacris sp</i>                | South America, from Amegeno                                                                               |                    |
| OR366  | Acrididae     | Ommatolampinae     | <i>Locheuma brunneri</i>            | South America, from Amegeno                                                                               |                    |
| OR365  | Acrididae     | Ommatolampinae     | <i>Lysacris festae</i>              | South America, from Amegeno                                                                               |                    |
| OR364  | Acrididae     | Ommatolampinae     | <i>Ommatolampis quadrimaculata</i>  | South America, from Amegeno                                                                               |                    |
| OR322  | Acrididae     | Ommatolampinae     | <i>Pollostacris sp</i>              | South America, from Amegeno                                                                               |                    |
| OR348  | Acrididae     | Ommatolampinae     | <i>Psilosirtus sp</i>               | South America, from Amegeno                                                                               |                    |
| OR323  | Acrididae     | Ommatolampinae     | <i>Syntomacrella sp</i>             | South America, from Amegeno                                                                               |                    |
| OR336  | Acrididae     | Ommatolampinae     | <i>Vilerna sp</i>                   | South America, from Amegeno                                                                               |                    |
| OR321  | Acrididae     | Ommatolampinae     | <i>Xiphidiopteron sp</i>            | South America, from Amegeno                                                                               |                    |
| OR396  | Acrididae     | Oxyinae            | <i>Kosciuscola tristis</i>          | NSW population                                                                                            | ?                  |
| OR315  | Acrididae     | Oxyinae            | <i>Oxya chinensis</i>               | South Africa: Eastern Cape Prov. Great Fish River NR River walk near cabin (S33 01.619° E026 47.748°)     | 18-II-2009         |
| N/A    | Acrididae     | Oxyinae            | <i>Pseudoxya diminuta</i>           | China, from Genbank                                                                                       |                    |
| OR345  | Acrididae     | Pauliniinae        | <i>Paulinia acuminata</i>           | South America, from Amegeno                                                                               |                    |
| OR249  | Acrididae     | Proctolabinae      | <i>Coscineuta sp</i>                | Panama: Barro Colorado Island                                                                             | 14-21-VII-2002     |
| OR368  | Acrididae     | Proctolabinae      | <i>Poecilocloeus napoana</i>        | South America, from Amegeno                                                                               |                    |
| OR371  | Acrididae     | Rhytidochronotinae | <i>Galidacris variabilis</i>        | South America, from Amegeno                                                                               |                    |
| OR337  | Acrididae     | Rhytidochronotinae | <i>Paropaon sp</i>                  | South America, from Amegeno                                                                               |                    |
| OR224  | Acrididae     | Spathosterninae    | <i>Spathosternum nigrotaeniatum</i> | South Africa: KwaZulu-Natal-Drakensberg, Draycott                                                         | 29-III-2005        |
| OR560  | Acrididae     | Tropidoplineae     | <i>Petamella prosternalis</i>       | South Africa: Kwazulu-Natal, Zululand, Nyalazi Forestry Estate                                            | 28-III-2008        |
| OR295  | Lentulidae    | Lentulinae         | <i>Lentula callani</i>              | South Africa: Western Cape Prov. Outeniqua NR, Montagu Pass (S33 53.001° E033 25.844°)                    | 13-II-2009         |
| OR316  | Lithidiidae   | Lithidiinae        | <i>Lithidiopsis carinatus</i>       | Namibia: ~80 km W. of Sesfontein on Puros road (S18 49' 55" E13 09' 09")                                  | 20-IX-2001         |
| OR367  | Ommexechidae  | Ommexechinae       | <i>Ommexecha vires</i>              | South America, from Amegeno                                                                               |                    |
| OR151  | Pamphagidae   | Prionotropisinae   | <i>Prionotropis hystrix</i>         | France: St Victoire, Vauvenargues (N 43 32 59.21 - E 005 39 59.75)                                        | July 2008          |
| OR540  | Pamphagodidae |                    | <i>Hemicharilus monomorphus</i>     | Namibia: E of Windhoek (22 32.103S 17 16.001E)                                                            | 20-III-2008        |
| OR1000 | Romaleidae    | Romaleinae         | <i>Romalea microptera</i>           | Big Cypress Bend trail, Fakahatchee Strand Preserve State Park, N25°56'30.7" W81°28'09.4"                 | 4-5/VIII/2009      |
| OR265  | Romaleidae    | Romaleinae         | <i>Xyleus modestus</i>              | Bolivia: Villa Tunari, farmland outside village                                                           | 1-VIII-2003        |

|       |            |             |                             |                                                                 |           |
|-------|------------|-------------|-----------------------------|-----------------------------------------------------------------|-----------|
| OR204 | Tristridae | Tristirinae | <i>Tristira magellanica</i> | Argentina, Santa Cruz, Parque Nacional Los Glaciares, Rio Mitre | 12-XII-03 |
|-------|------------|-------------|-----------------------------|-----------------------------------------------------------------|-----------|
